# Supplementary material for: Synthesis of a hollow structured core–shell Au@CeO2–ZrO2 nanocatalyst and its excellent catalytic performance
Source: Royal Society of Chemistry journal article supplement (doi:10.1039/c7ta00015d), 2017-01-01
Supplement: c7ta00015d1.pdf [file c7ta00015d1.pdf]

Supporting Information:

## **Synthesis of hollow structured core-shell Au@CeO<sub>2</sub>-ZrO<sub>2</sub> nanocatalyst and its excellent catalytic performance**

Chenhao Du, Yun Guo, Yanglong Guo, Xue-Qing Gong, Guanzhong Lu\*

Key Laboratory for Advanced Materials and Research Institute of Industrial Catalysis, School of Chemistry and Molecular Engineering, East China University of Science and Technology, Shanghai 200237, P. R. China.

\* Corresponding author: Fax: +86-21-64252923, E-mail: gzhlu@ecust.edu.cn (G.Z. Lu)

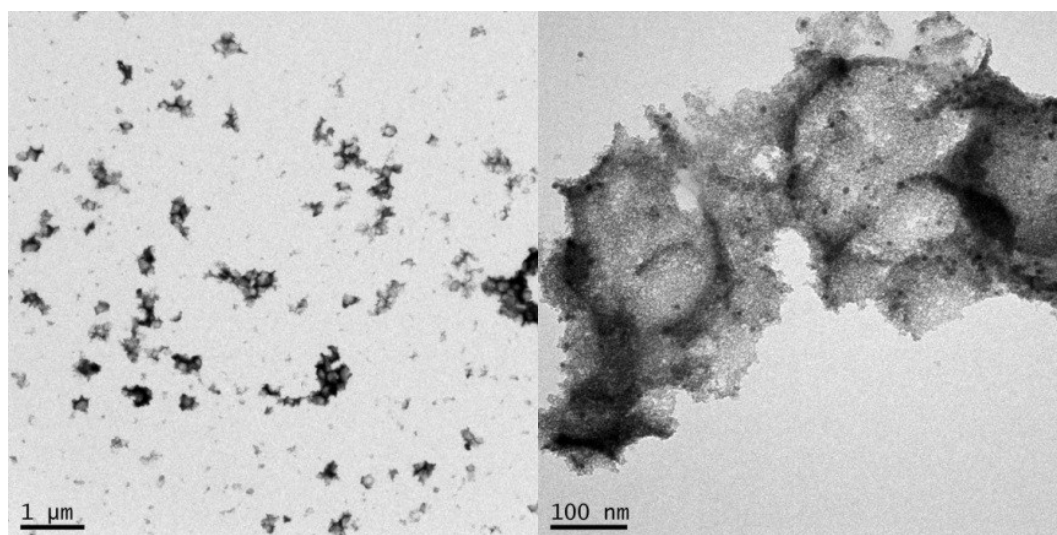

**Figure S1.** TEM images of the sample synthesized with PVP-stabilized Au NPs.

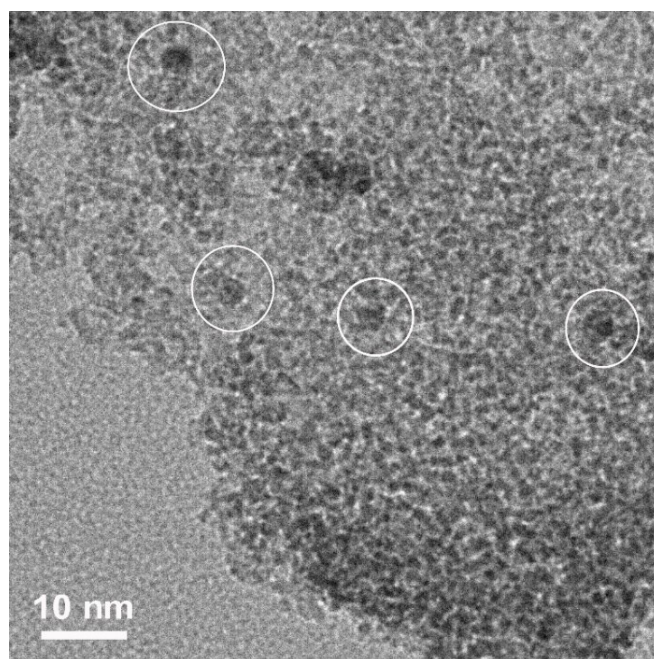

**Figure S2.** TEM image of the hollow Au@CeO<sub>2</sub>-ZrO<sub>2</sub> nanocatalyst. White circles indicate the sub-10 nm core-shell structure, in which individual Au nanoparticle was encapsulated by the surrounding CeO<sub>2</sub>-ZrO<sub>2</sub> nanocrystals.

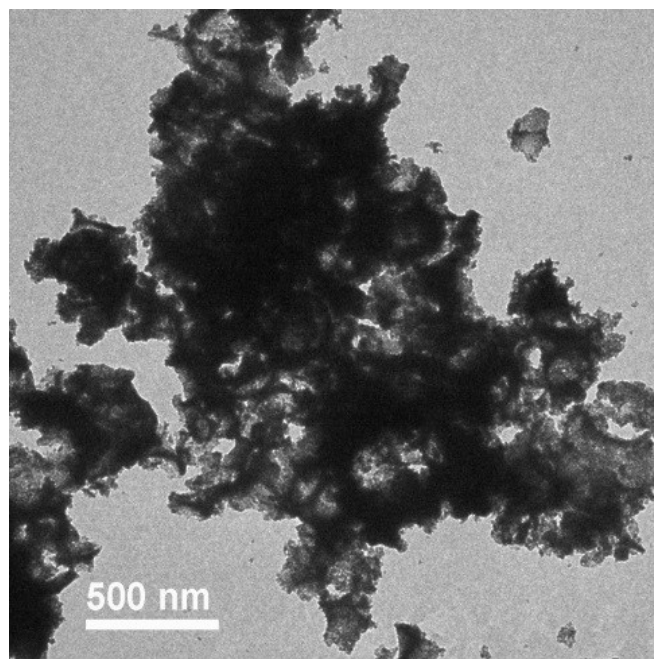

**Figure S3.** TEM image of the Au@CeO<sub>2</sub>-ZrO<sub>2</sub> catalyst used repeatedly 5 times in the selective reduction of 4-NP.

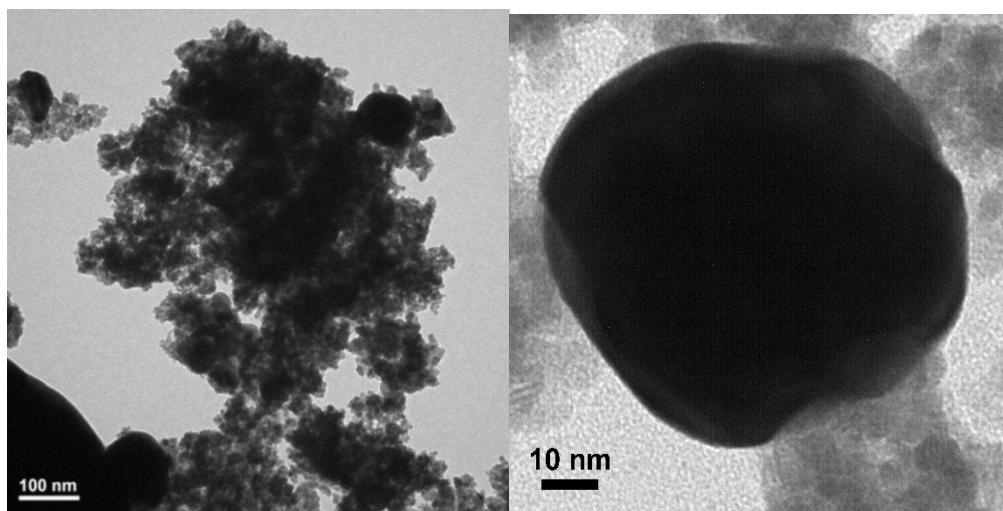

**Figure S4.** TEM image of physically mixed sample of Au NPs and nanosized CeO<sub>2</sub>-ZrO<sub>2</sub>. The image clearly showed aggregated Au particles in the sample.

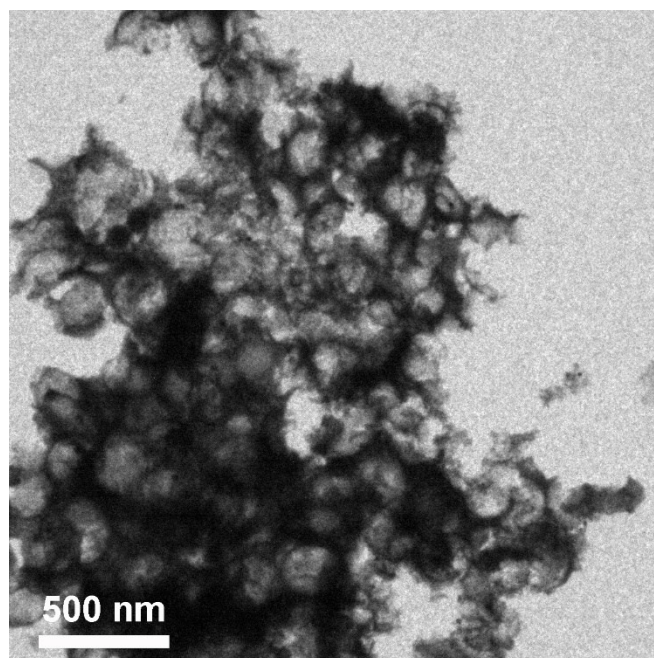

**Figure S5.** TEM image of Au@CeO<sub>2</sub>-ZrO<sub>2</sub> sample used in the CO oxidation at 200 °C for 18 h.
